# Supplementary material for: Two-photon excited red-green “discoloration” bioprobes for monitoring lipid droplets and lipid droplet-lysosomal autophagy
Source: Royal Society of Chemistry journal article supplement (doi:10.1039/d2tb02621j), 2023-01-01
Supplement: d2tb02621j1.pdf [file d2tb02621j1.pdf]

## Supporting Information

### **Two-photon excited red-green "discoloration" bioprobes for monitoring lipid droplets and lipid droplet-lysosomal autophagy**

*Ming-Xuan Liu<sup>a</sup>, Li Xu<sup>b</sup>, Peng-Fei Zhu<sup>a</sup>, Xin Li<sup>a</sup>, Miao Shan<sup>a</sup>, Wei Jin<sup>a</sup>, Jing Chen*

*<sup>\*b</sup>, Yong Ling<sup>\*a</sup>, Xiao-Ling Zhang<sup>\*a</sup>*

*<sup>a</sup> School of Pharmacy, Nantong University, Nantong, 226001, Jiangsu, China.*

*<sup>b</sup>Institute of Translational Medicine, Medical College, Yangzhou University,  
Yangzhou 225001, Jiangsu, China.*

\*Corresponding authors: Zhangxiaoling@ntu.edu.cn (Xiao-Ling Zhang),  
Lyyy111@sina.com (Yong Ling), chenjing2018@yzu.edu.cn (Jing Chen).

## Content

|                                                                                         |    |
|-----------------------------------------------------------------------------------------|----|
| S1. Synthetic route of DPABP-BI.....                                                    | 3  |
| S2. The spectroscopic properties of DPABP-BI .....                                      | 4  |
| S3. pH response of DPABP-BI .....                                                       | 5  |
| S4. Cytotoxicity test of DPABP-BI .....                                                 | 9  |
| S5. Lipophilicity test of DPABP-BI.....                                                 | 10 |
| S6. Study of autophagy processes .....                                                  | 11 |
| S7. Two-photon fluorescence test .....                                                  | 13 |
| S8. Two-photon imaging of DPABP-BI .....                                                | 14 |
| S9. <sup>1</sup> H-NMR and <sup>13</sup> C-NMR Spectra of compounds 1 to DPABP-BI ..... | 15 |
| S8. HR-MS Spectra of DPABP-BI .....                                                     | 18 |

## S1. Synthetic route of DPABP-BI

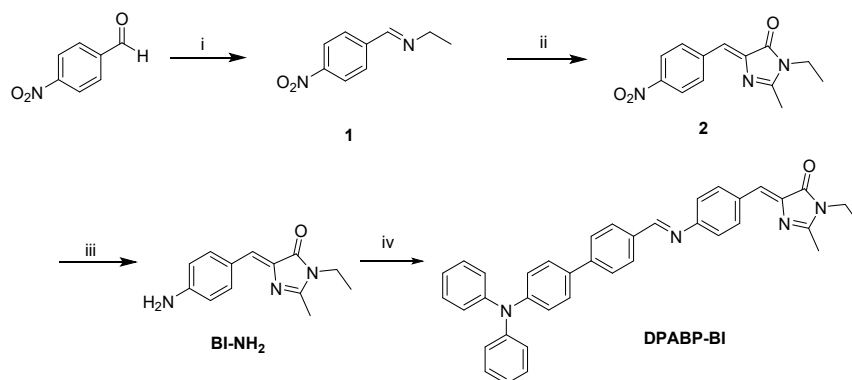

**Fig. S1.** Preparation of the compounds DPABP-BI: (i) ethylamine, ethanol, room temperature, 24 h; (ii) Methyl 2-((1-ethoxyethylidene)amino)acetate, room temperature, 24 h; (iii) Pd/C, H<sub>2</sub>, room temperature, 30 minutes; (iv) tris(4-formylphenyl)amine, ethanol, room temperature, 48 h.

## S2. The spectroscopic properties of DPABP-BI

**Table S1** Photophysical data of **DPABP-BI**

| solvent          | $\lambda_{\text{ab}}$ (nm) | $\lambda_{\text{em}}$ (nm) | Stoke's<br>shift (nm) | $\phi_{\text{F}}$ |
|------------------|----------------------------|----------------------------|-----------------------|-------------------|
| DCM              | 485                        | 610                        | 125                   | 0.23              |
| THF              | 485                        | 630                        | 145                   | 0.32              |
| MeOH             | 485                        | 600                        | 115                   | 0.18              |
| DMF              | 493                        | 600                        | 107                   | 0.30              |
| DMSO             | 500                        | 605                        | 105                   | 0.31              |
| H <sub>2</sub> O | 490                        | 605                        | 115                   | 0.08              |

Abbreviation:  $\lambda_{\text{ab}}$  = absorption maximum,  $\lambda_{\text{em}}$  = emission maximum,  $\phi_{\text{F}}$  = fluorescence quantum yield.

### S3. pH response of DPABP-BI

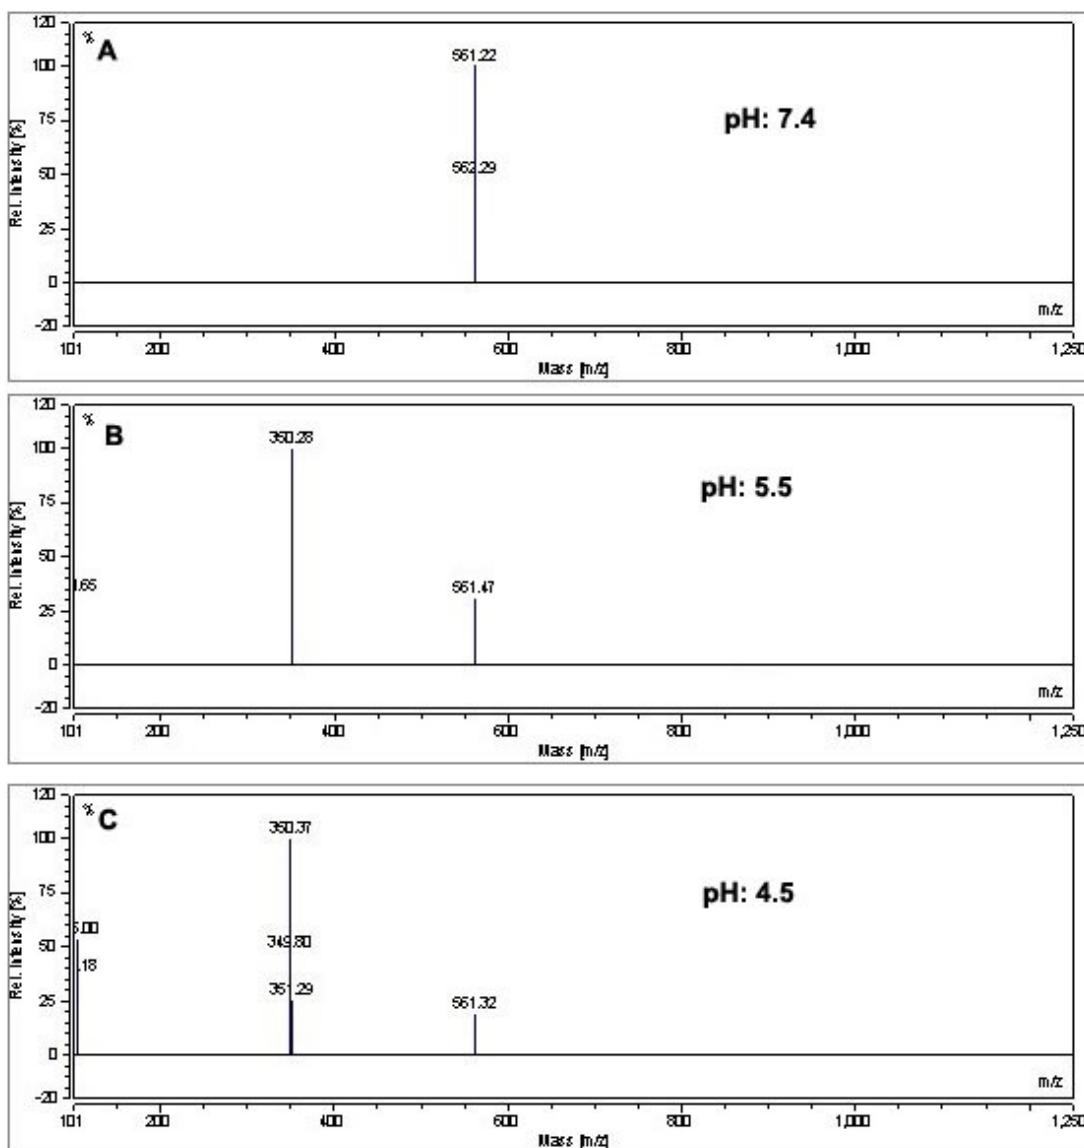

Fig. S2. MS spectrum of DPABP-BI at different pH.

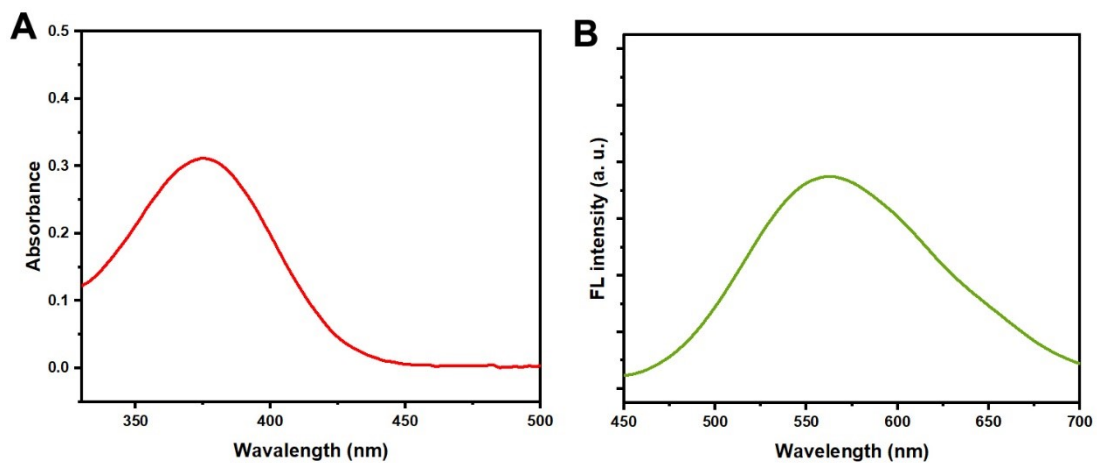

**Fig. S3.** (A) Absorption and (B) emission spectra of 4'-(diphenylamino)-[1,1'-biphenyl]-4-carbaldehyde in DMSO. Concentration: 10  $\mu\text{M}$ .

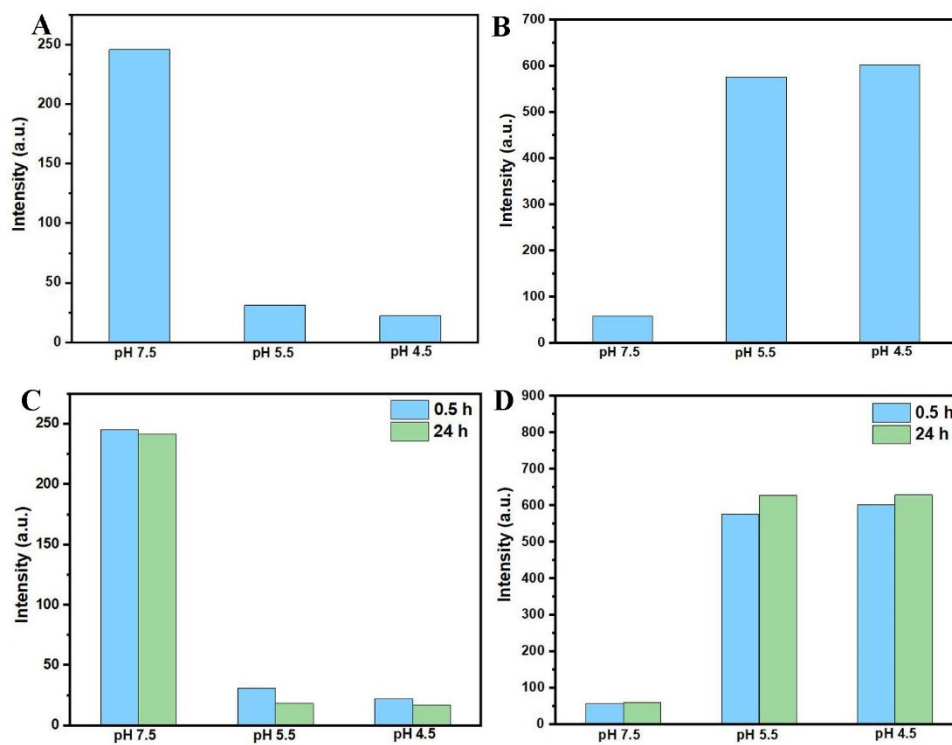

**Fig. S4.** The fluorescence of probe DPABP-BI at (A) 610 nm and (B) 550 nm at pH 7.5, 5.5 and 4.5, incubation time: 30 min. The fluorescence of DPABP-BI at (C) 610 nm and (D) 550 nm vs time at pH 7.5, 5.5 and 4.5. Concentration: 10  $\mu$ M.

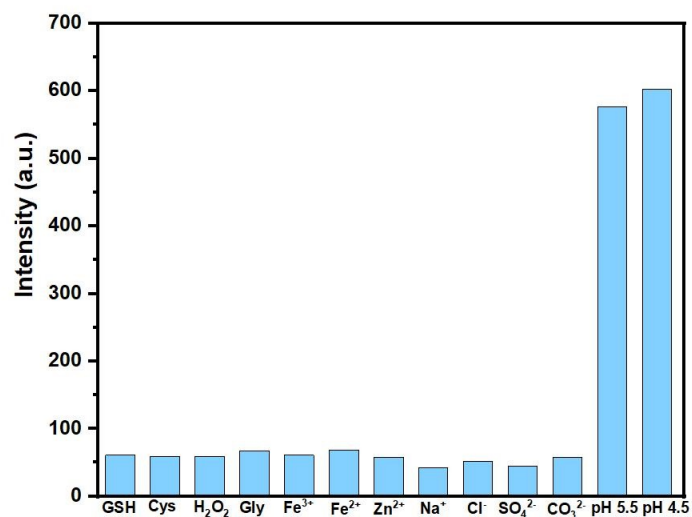

**Fig. S5.** Fluorescence intensity of DPABP-BI at 550 nm (the emission of the decomposed product 4'-(diphenylamino)-[1,1'-biphenyl]-4-carbaldehyde in the presence of different biologically active small molecules and ions at pH 7.5. Concentration: 10  $\mu$ M (DMSO/Buffer = 1/1, v/v).



#### S4. Cytotoxicity test of DPABP-BI

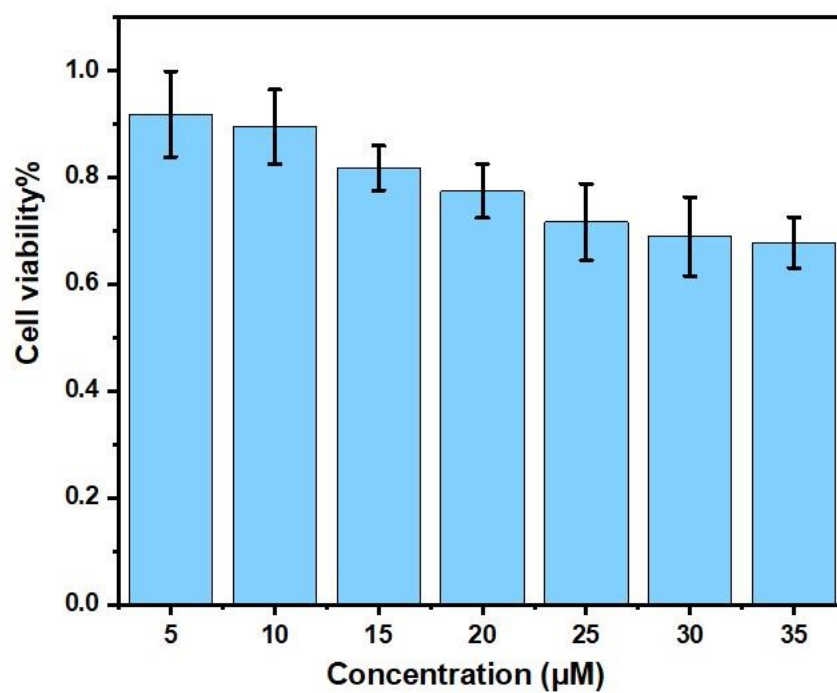

**Fig. S6.** Viability of HeLa cells incubated with DPABP-BI at different concentrations.

### S5. Lipophilicity test of DPABP-BI

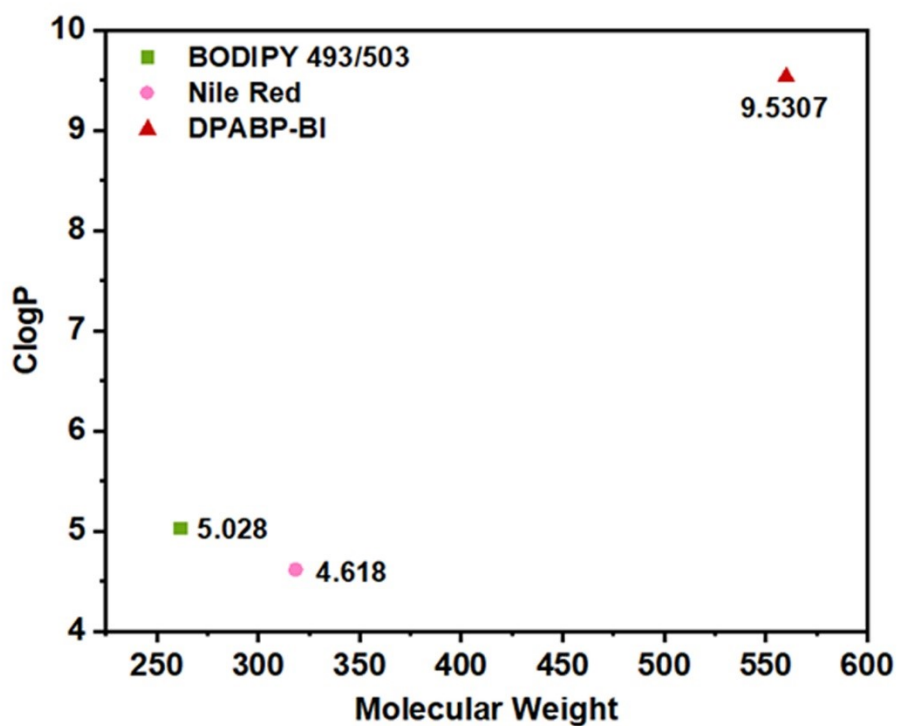

**Fig. S7.** ClogP values of BODIPY 493/503, Nile Red, and DPABP-BI.

## S6. Study of autophagy processes

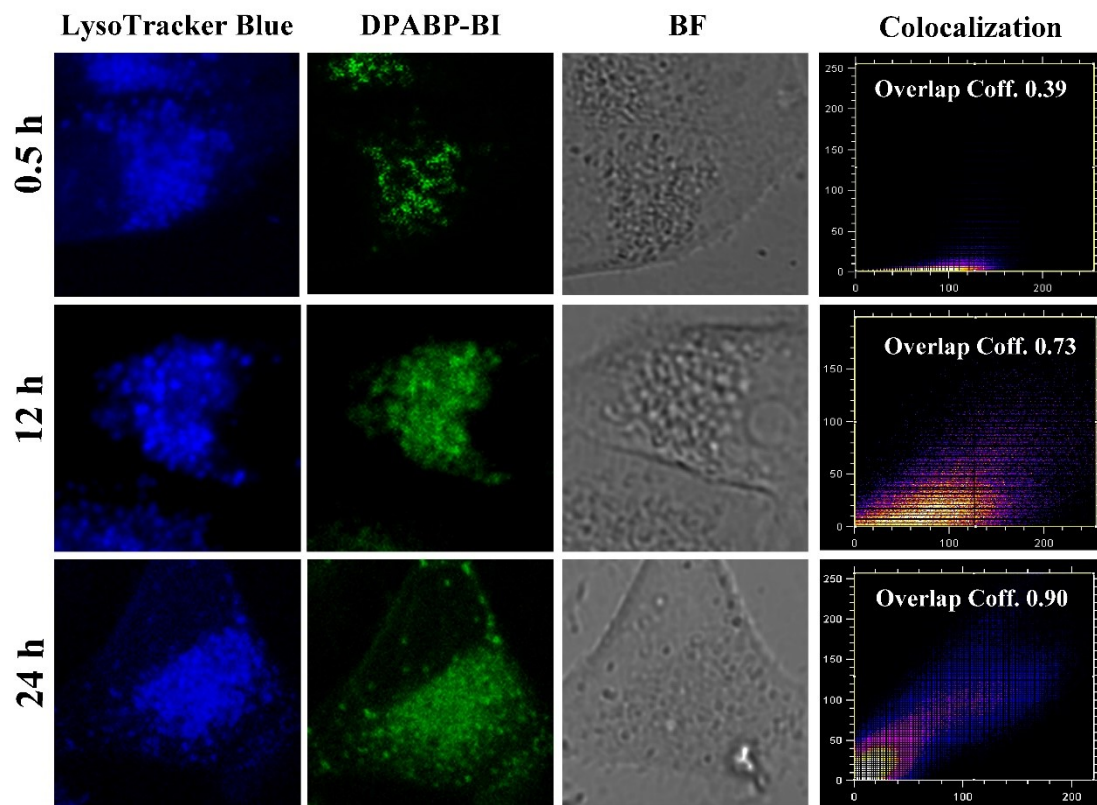

**Fig. S8.** CLMS images (400 X) of HeLa cells incubated with 4  $\mu\text{M}$  DPABP-BI ( $\lambda_{\text{ex}} = 380 \text{ nm}$  and  $\lambda_{\text{em}} = 500\text{--}560 \text{ nm}$ ) and 4  $\mu\text{M}$  LysoTracker Blue ( $\lambda_{\text{ex}} = 409 \text{ nm}$  and  $\lambda_{\text{em}} = 425\text{--}475 \text{ nm}$ ) for different time.

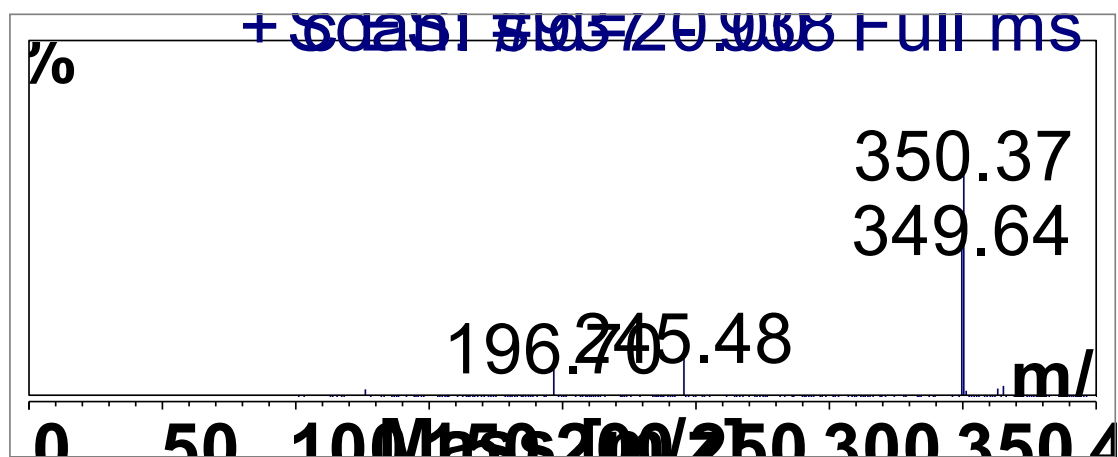

**Fig. S9. Low-resolution mass spectrometry of DPABP-BI products during autophagy.**

## S7. Two-photon fluorescence test

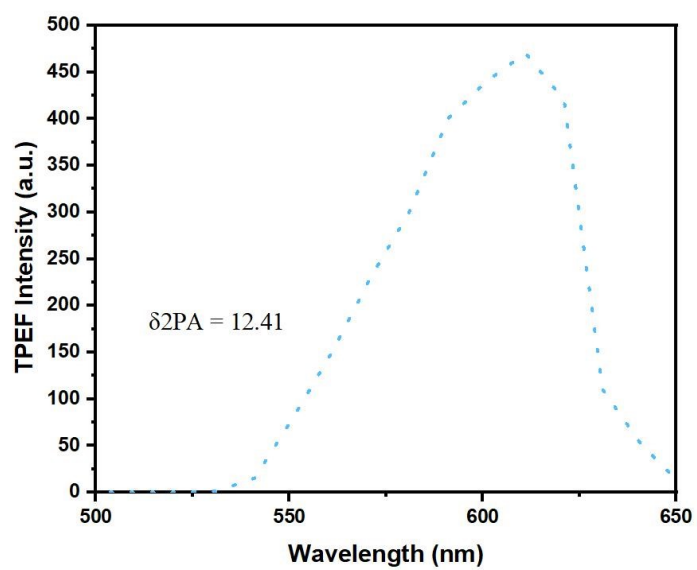

**Fig. S10.** Two-photon excited fluorescence spectra of DPABP-BI in THF. Concentration of DPABP-BI: 20  $\mu$ M, excitation wavelength: 1000 nm.

## S8. Two-photon imaging of DPABP-BI

### DPABP-BI

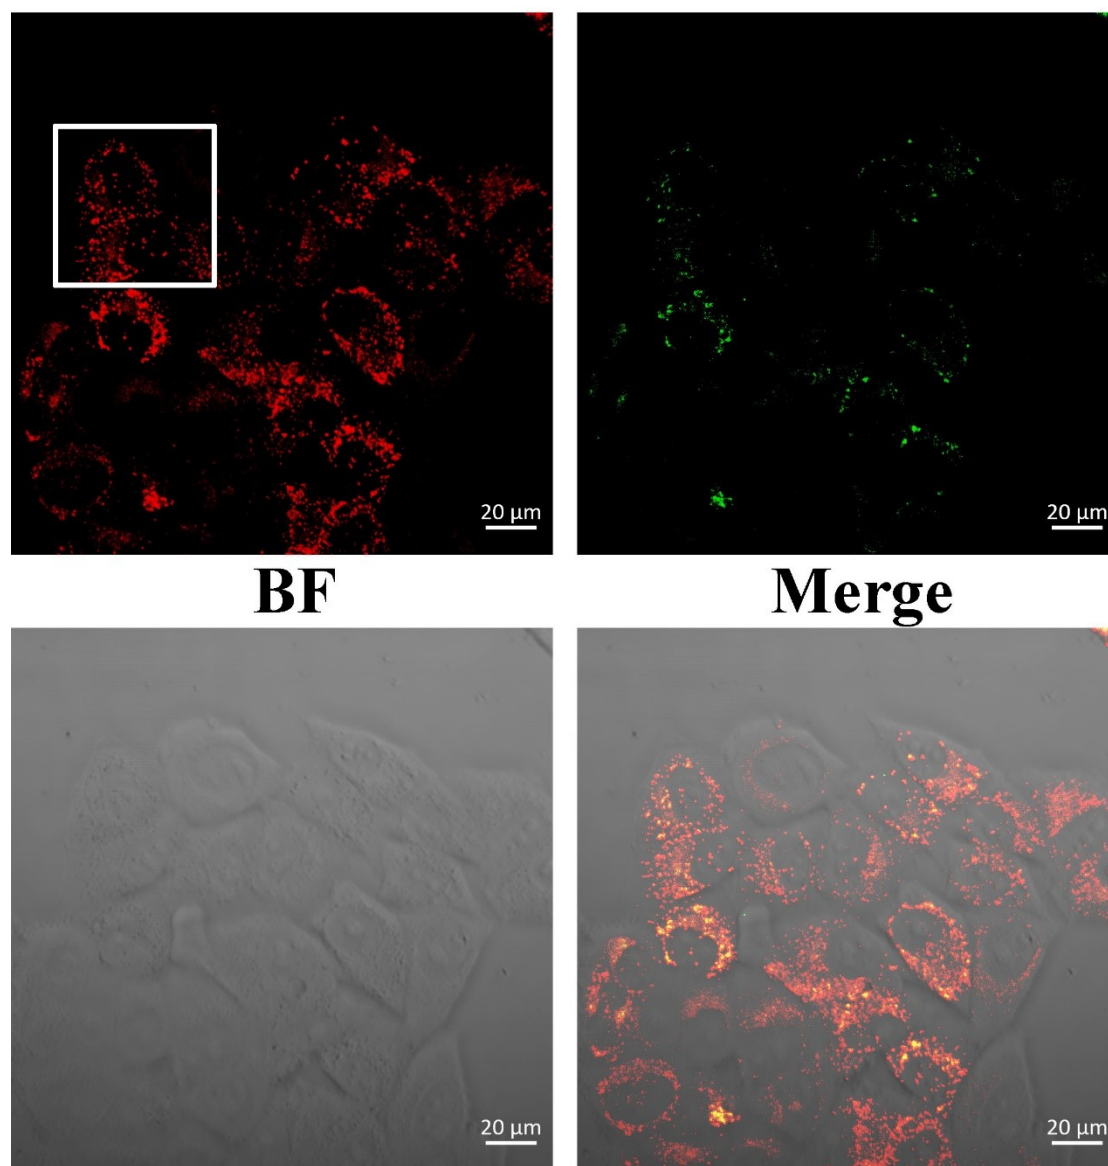

**Fig. S11.** CLMS images (400 X) of DPABP-BI in HeLa cells. Incubation time: 30 min. Concentration: 4 μM, red channel:  $\lambda_{\text{ex}} = 1000$  nm and  $\lambda_{\text{em}} = 600\text{--}720$  nm, green channel:  $\lambda_{\text{ex}} = 760$  nm and  $\lambda_{\text{em}} = 500\text{--}560$  nm, Scale bar: 20 μm.

### S9. $^1\text{H}$ -NMR and $^{13}\text{C}$ -NMR Spectra of compounds 1 to DPABP-BI

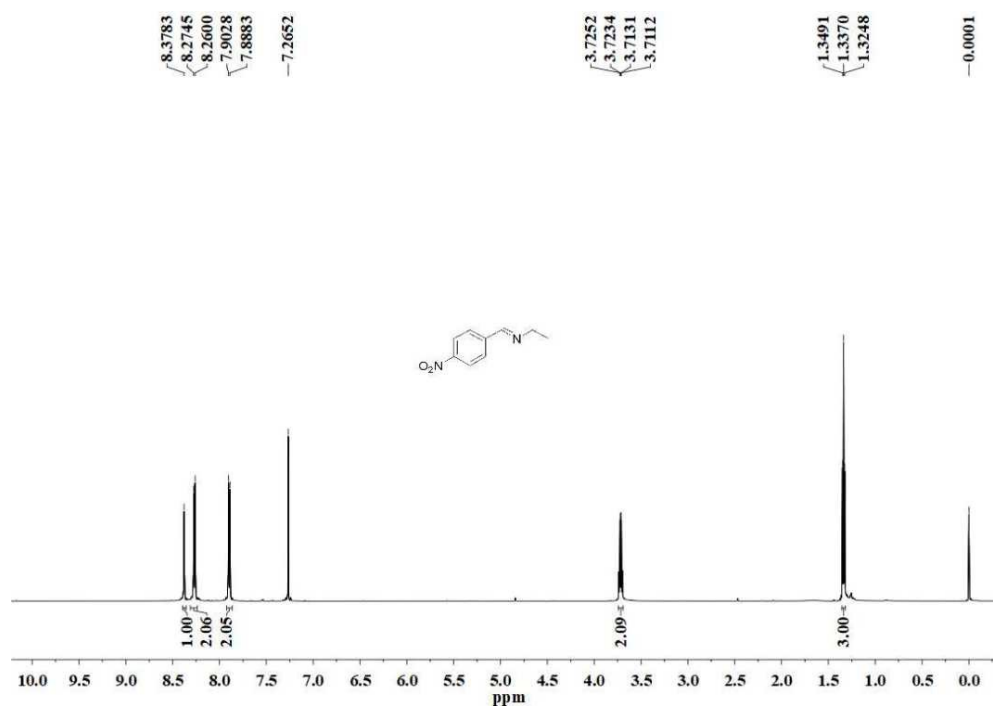

Fig. S12.  $^1\text{H}$  NMR spectrum of 1 (600 MHz, CDCl<sub>3</sub>)

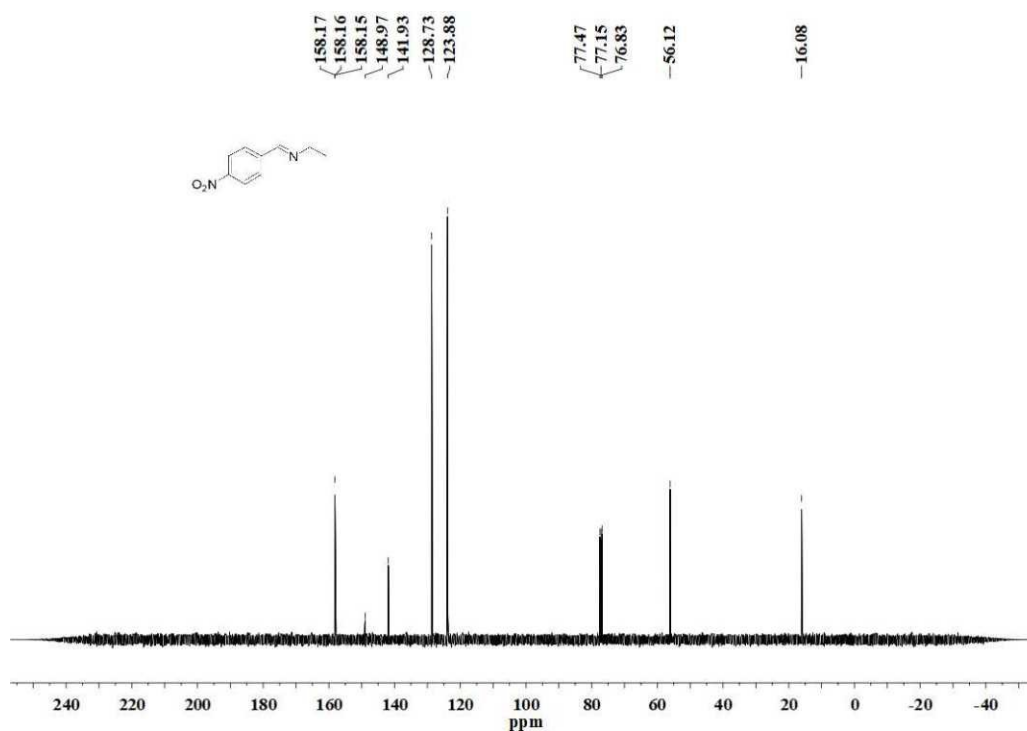

Fig. S13.  $^{13}\text{C}$  NMR spectrum of 1 (101 MHz, CDCl<sub>3</sub>)

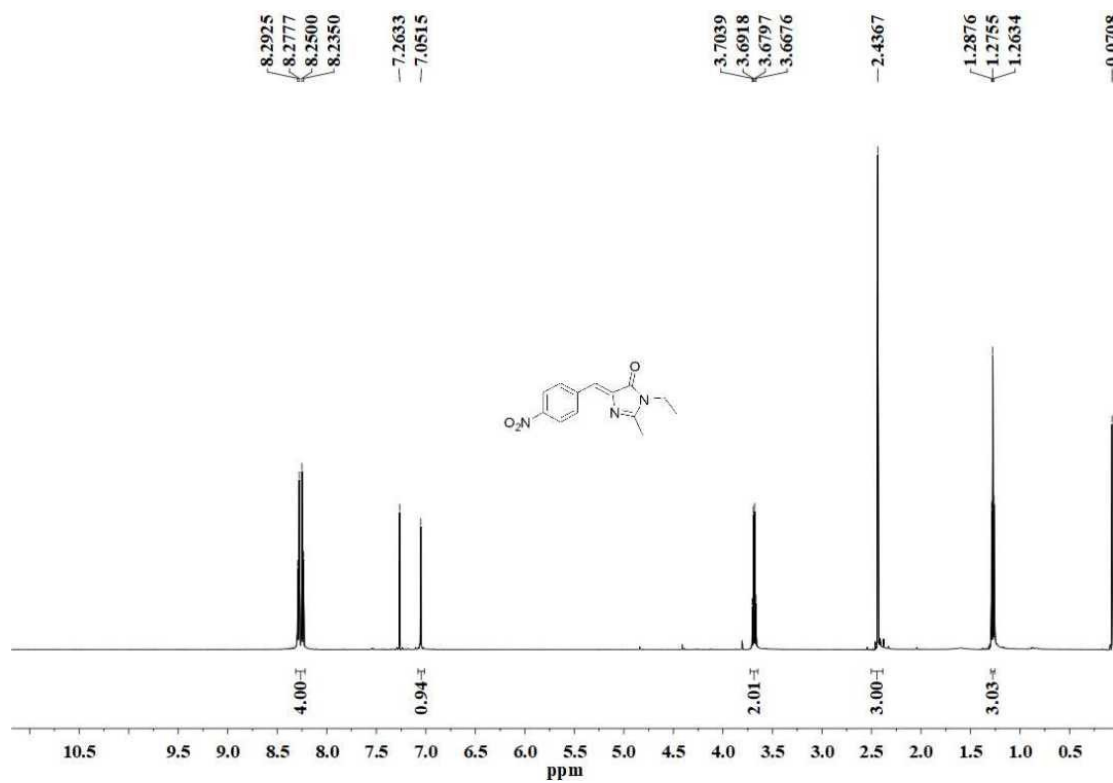

Fig. S14.  $^1\text{H}$  NMR spectrum of **2** (600 MHz,  $\text{CDCl}_3$ )

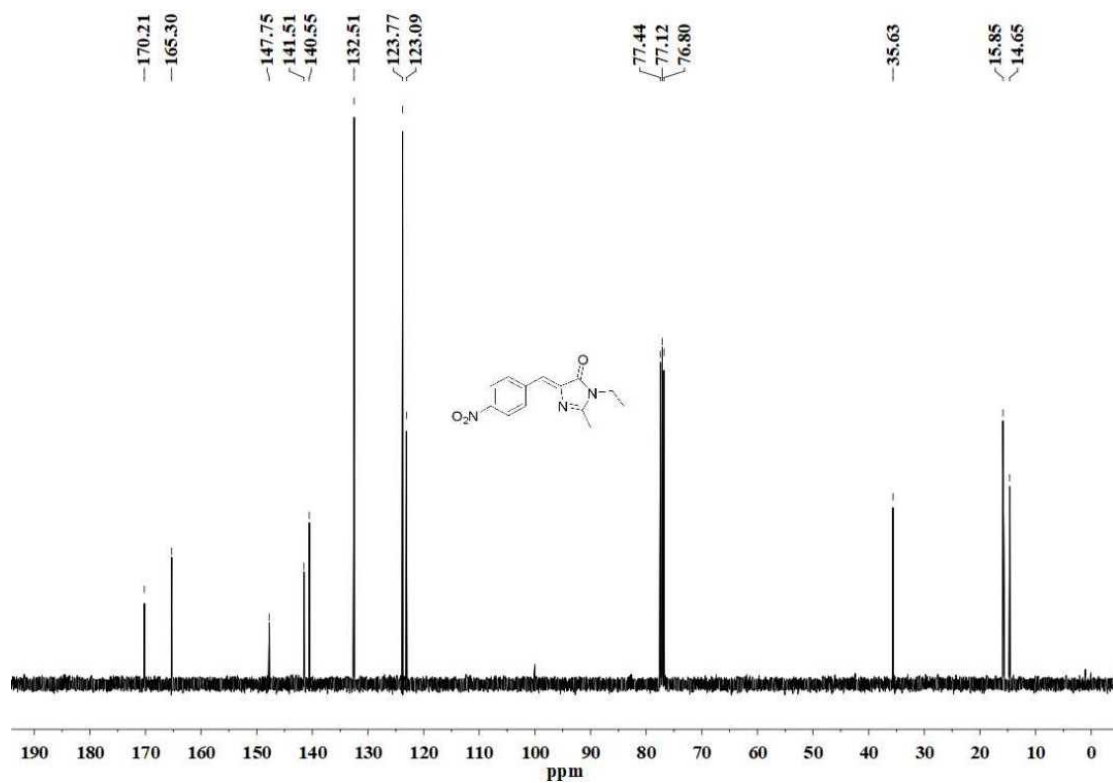

Fig. S15.  $^{13}\text{C}$  NMR spectrum of **2** (101 MHz,  $\text{CDCl}_3$ )



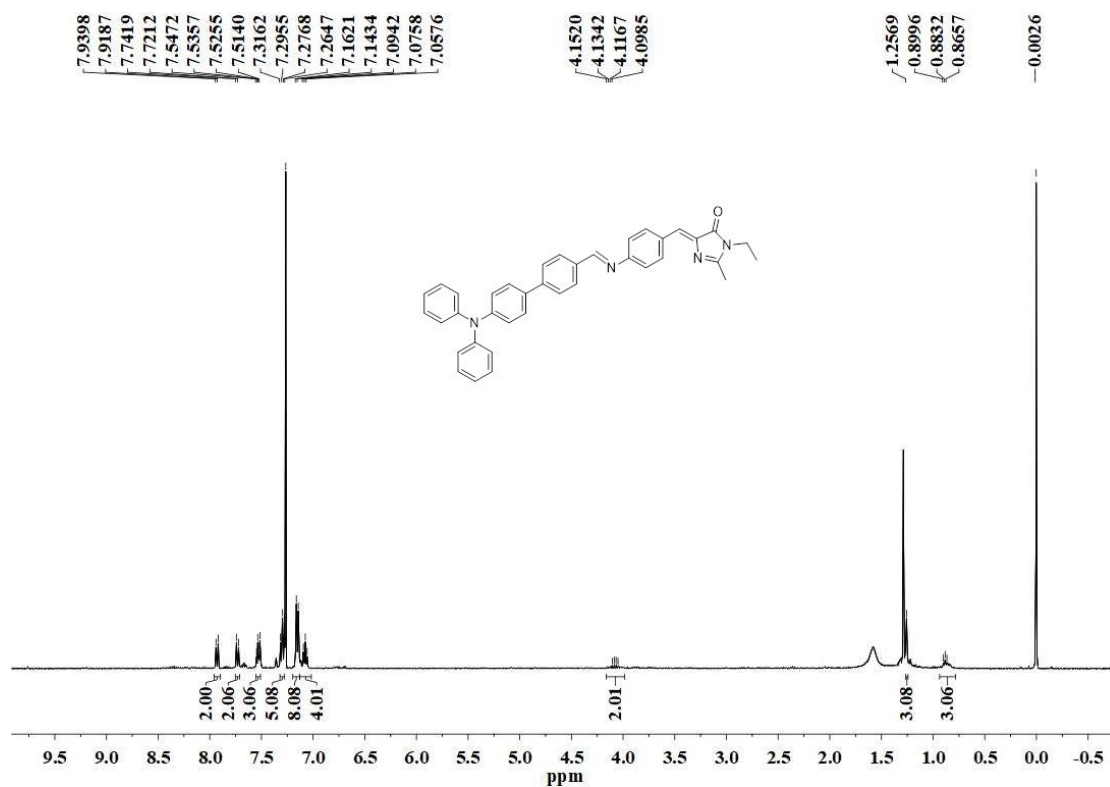

Fig. S16. <sup>1</sup>H NMR spectrum of DPABP-BI (400 MHz, CDCl<sub>3</sub>)

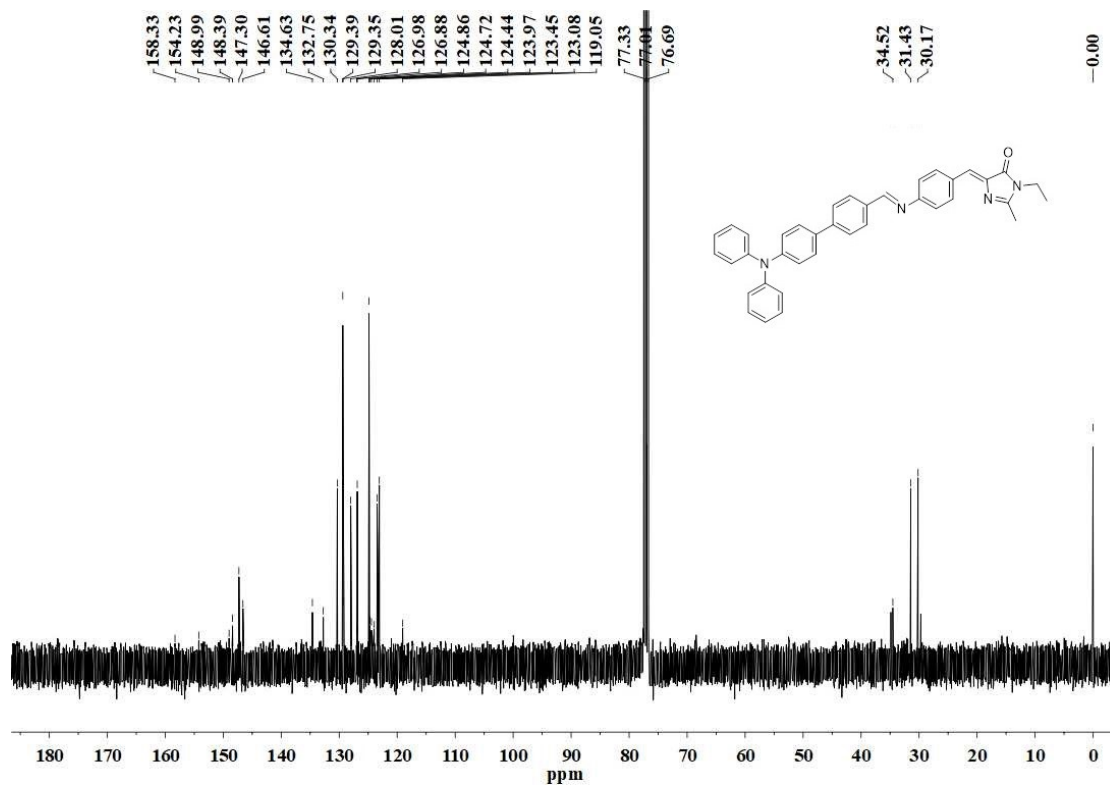

Fig. S17. <sup>13</sup>C NMR spectrum of DPABP-BI (101 MHz, CDCl<sub>3</sub>)

## S8. HR-MS Spectra of DPABP-BI

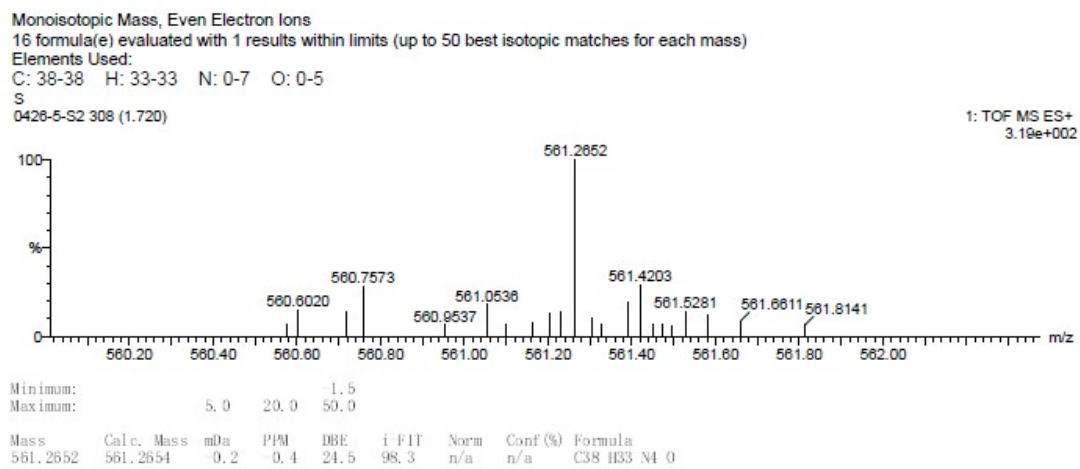

**Fig. S18.** HR-MS spectrum of DPABP-BI
